# Supplementary material for: Initial assessment of the infant with neonatal cholestasis—Is this biliary atresia?
Source: PLoS One. 2017 May 11;12(5):e0176275. doi: 10.1371/journal.pone.0176275 (PMC5426590; doi:10.1371/journal.pone.0176275)
Supplement: S1 Table — (DOCX) [file pone.0176275.s001.docx]

Supporting Information for:

**Initial assessment of the infant with neonatal cholestasis – is this biliary atresia?**

Benjamin L. Shneider1*, Jeff Moore2, Nanda Kerkar3,4, John C. Magee5, Wen Ye2, Saul J. Karpen6, Binita M. Kamath7, Jean P. Molleston8, Jorge A. Bezerra9, Karen F. Murray10, Kathleen M. Loomes11, Peter F. Whitington12, Philip Rosenthal13, Robert H. Squires14, Stephen L. Guthery15, Ronen Arnon4, Kathleen B. Schwarz16, Yumirle P. Turmelle17, Averell H. Sherker18, Ronald J. Sokol19 for the Childhood Liver Disease Research Network.

1 Pediatric Gastroenterology, Hepatology, and Nutrition; Baylor College of Medicine; Houston, Texas, United States

2 Department of Biostatistics; University of Michigan; Ann Arbor, Michigan, United States

3 Children’s Hospital of Los Angeles; Los Angeles, California, United States

4 Mount Sinai; New York, New York, United States

5 University of Michigan Medical School; Ann Arbor, Michigan, United States

6 Pediatric Gastroenterology, Hepatology, and Nutrition; Emory University School of Medicine/Children’s Healthcare of Atlanta; Atlanta, Georgia, United States

7 Division of Gastroenterology, Hepatology, and Nutrition; Hospital for Sick Children and University of Toronto; Toronto, Ontario, Canada

8 Pediatric Gastroenterology, Hepatology, and Nutrition; Indiana University School of Medicine/Riley Hospital for Children; Indianapolis, Indiana, United States

9 Division of Pediatric Gastroenterology, Hepatology, and Nutrition; Cincinnati Children’s Hospital Medical Center; Cincinnati, Ohio, United States

10 Division of Gastroenterology and Hepatology; University of Washington Medical Center, Seattle Children’s, Seattle, Washington, United States

11 Pediatric Gastroenterology, Hepatology, and Nutrition; Children’s Hospital of Philadelphia; Philadelphia, Pennsylvania, United States

12 Pediatrics Division of Gastroenterology, Hepatology, and Nutrtion; Ann and Robert H. Lurie Children’s Hospital of Chicago; Chicago, Illinois, United States

13 Division of Gastroenterology, Hepatology, and Nutrition; Department of Pediatrics; University of California, San Francisco; San Francisco, California, United States

14 Children’s Hospital of Pittsburgh; Pittsburgh, Pennsylvania, United States

15 Pediatric Gastroenterology, Hepatology, and Nutrition; University of Utah, Salt Lake City, Utah, United States

16 Johns Hopkins School of Medicine; Baltimore, Maryland, United States

17 Washington University School of Medicine, St. Louis, Missouri, United States

18 Liver Diseases Research Branch, National Institute of Diabetes and Digestive and Kidney Diseases, National Institutes of Health; Bethesda, Maryland, United States

19 Section of Pediatric Gastroenterology, Hepatology, and Nutrition, Department of Pediatrics, University of Colorado School of Medicine; Children’s Hospital Colorado; Aurora, Colorado, United States

***Corresponding Author:** Benjamin L. Shneider: [Benjamin.Shneider@bcm.edu](mailto:Benjamin.Shneider@bcm.edu)

**S1 Table. Institutional Review Boards**

| **Emory University** Institutional Review Board 1599 Clifton Road, 5th Floor Atlanta, Georgia 30322 Tel: 404-712-0720 Fax: 404-727-1358 Email: [irb@emory.edu](mailto:irb@emory.edu) Web: <http://www.irb.emory.edu/> |
| --- |
| **Johns Hopkins Medicine** Office of Human Subjects Research Institutional Review Boards 1620 McElderry Street, Reed Hall, Suite B-130 Baltimore, Maryland 21205-1911 Tel: 410-955-3008 Fax: 410-955-4367 Fax Email: [jhmirb@jhmi.edu](mailto:jhmirb@jhmi.edu) |
| **Cincinnati Children’s** Office of Research Compliance & Regulatory Affairs 3333 Burnet Avenue Suite R3325 MLC 7040 Cincinnati, OH 45229-3039 Tel: 513-636-2754 Fax: 513-636-1321 Email: [orcra@cchmc.org](mailto:orcra@cchmc.org) |
| Colorado Multiple Institutional Review Board, CB F490 **University of Colorado**, Anschutz Medical Campus 13001 E. 17th Place, Building 500, Room N3214 Aurora, Colorado 80045 Tel: 303-724-1055 Fax: 303-724-0990 Email: [comirb@ucdenver.edu](mailto:comirb@ucdenver.edu) Web: uchsc.edu/comirb Federalwide Assurance (FWA): FWA00005070 |
| **Baylor College of Medicine** Office of Research One Baylor Plaza, 600D Houston, Texas 77030 Tel: 713-798-6970 Fax: 713-798-6990 Email: [irb@bcm.tmc.edu](mailto:irb@bcm.tmc.edu) |
| **Indiana University** Office of the Vice President for Research Office of Research Compliance 980 Indiana Ave., LV 3315 Indianapolis, IN 46202 Tel: 317-274-8289 (Indianapolis) or 812-856-4242 (Bloomington) Email: [irb@iu.edu](mailto:irb@iu.edu) |
| **Children’s Hospital Los Angeles** Committee on Clinical Investigations (CCI) Institutional Review Board (IRB) CHLA Institutional Review Board Human Subjects Protection Program 4650 Sunset Boulevard, Mailstop #23 Los Angeles, CA 90027-6062 Tel: 323-361-2265 Fax: 323-361-3620 Web: <http://www.childrenshospitalla.org/body.cfm?id=213> FWA: 00001914 |
| Program for the Protection of Human Subjects **Mount Sinai School of Medicine and Mount Sinai Hospital** One Gustave L. Levy Place, Box 1075 3 East 101st Street, First Floor New York, NY 10029-6530 Tel: 212-824-8200 Fax: 212-876-6786 |
| **The Children’s Hospital of Philadelphia** Research Institute The Committee for the Protection of Human Subjects (IRB) 3535 Market Street, Suite 1200 Philadelphia, PA 19104 Tel: 215-590-2830 Email: [IRBOffice@emial.chop.edu](mailto:IRBOffice@emial.chop.edu) Email: [regaffairs@email.chop.edu](mailto:regaffairs@email.chop.edu) |
| **University of Pittsburgh** Institutional Review Board 3500 Fifth Avenue Pittsburgh, PA 15213 Tel: 412-383-1480 Fax: 412-383-1508 Web: <http://www.irb.pitt.edu> |
| **University of California** San Francisco Human Research Protection Program Committee on Human Research 3333 California St., Suite 315 San Francisco, CA 94118 Tel: 415-476-1814 Web: [IRB@ucsf.edu](mailto:IRB@ucsf.edu) |
| **Seattle Children’s** Hospital Research Foundation Institutional Review Board FWA: 00002443 P.O. Box 5371 Seattle, WA 98145 Tel: 206-987-7804 Web: [irb@seattlechildrens.org](mailto:irb@seattlechildrens.org) |
| Research Ethics Board **The Hospital for Sick Children** 555 University Avenue Toronto, Ontario Canada M5G 1X8 Tel: 416-813-8279 Fax: 416-813-6515 Web: [www.sickkids.ca](http://www.sickkids.ca) |
| **Washington University in St. Louis** Human Research Protection Office 660 South Euclid Ave., Campus Box 8089 St. Louis, MO 63110 Tel: 314-633-7400 Fax: 314-367-3041 Web: <http://hrpohome.wustl.edu/> |
| **University of Michigan** Medical School Institutional Review Board (IRBMED) 2800 Plymouth Road Building 520, Room 3214 Ann Arbor, MI 48109-2800 Tel: 734-763-4768 Fax: 734-763-9603 Web: [irbmed@umich.edu](mailto:irbmed@umich.edu) |
| Ann & Robert H. Lurie **Children’s Hospital of Chicago** Institutional Review Board 225 E Chicago Ave. Room #19-376 Chicago, IL 60611 Tel: 773-755-6301 Fax: 773-755-6533 Email: [IRB@Luriechildrens.org](mailto:IRB@Luriechildrens.org) |
| **The University of Utah** Institutional Review Board 75 South 2000 East Salt Lake City, UT 84112 Tel: 801-851-3655 Email: [IRB@utah.edu](mailto:IRB@utah.edu) |
