# Supplementary material for: Initial assessment of the infant with neonatal cholestasis—Is this biliary atresia?
Source: PLoS One. 2017 May 11;12(5):e0176275. doi: 10.1371/journal.pone.0176275 (PMC5426590; doi:10.1371/journal.pone.0176275)
Supplement: S2 Table — (DOCX) [file pone.0176275.s002.docx]

Supporting Information for:

**Initial assessment of the infant with neonatal cholestasis – is this biliary atresia?**

Benjamin L. Shneider1*, Jeff Moore2, Nanda Kerkar3,4, John C. Magee5, Wen Ye2, Saul J. Karpen6, Binita M. Kamath7, Jean P. Molleston8, Jorge A. Bezerra9, Karen F. Murray10, Kathleen M. Loomes11, Peter F. Whitington12, Philip Rosenthal13, Robert H. Squires14, Stephen L. Guthery15, Ronen Arnon4, Kathleen B. Schwarz16, Yumirle P. Turmelle17, Averell H. Sherker18, Ronald J. Sokol19 for the Childhood Liver Disease Research Network.

1 Pediatric Gastroenterology, Hepatology, and Nutrition; Baylor College of Medicine; Houston, Texas, United States

2 Department of Biostatistics; University of Michigan; Ann Arbor, Michigan, United States

3 Children’s Hospital of Los Angeles; Los Angeles, California, United States

4 Mount Sinai; New York, New York, United States

5 University of Michigan Medical School; Ann Arbor, Michigan, United States

6 Pediatric Gastroenterology, Hepatology, and Nutrition; Emory University School of Medicine/Children’s Healthcare of Atlanta; Atlanta, Georgia, United States

7 Division of Gastroenterology, Hepatology, and Nutrition; Hospital for Sick Children and University of Toronto; Toronto, Ontario, Canada

8 Pediatric Gastroenterology, Hepatology, and Nutrition; Indiana University School of Medicine/Riley Hospital for Children; Indianapolis, Indiana, United States

9 Division of Pediatric Gastroenterology, Hepatology, and Nutrition; Cincinnati Children’s Hospital Medical Center; Cincinnati, Ohio, United States

10 Division of Gastroenterology and Hepatology; University of Washington Medical Center, Seattle Children’s, Seattle, Washington, United States

11 Pediatric Gastroenterology, Hepatology, and Nutrition; Children’s Hospital of Philadelphia; Philadelphia, Pennsylvania, United States

12 Pediatrics Division of Gastroenterology, Hepatology, and Nutrtion; Ann and Robert H. Lurie Children’s Hospital of Chicago; Chicago, Illinois, United States

13 Division of Gastroenterology, Hepatology, and Nutrition; Department of Pediatrics; University of California, San Francisco; San Francisco, California, United States

14 Children’s Hospital of Pittsburgh; Pittsburgh, Pennsylvania, United States

15 Pediatric Gastroenterology, Hepatology, and Nutrition; University of Utah, Salt Lake City, Utah, United States

16 Johns Hopkins School of Medicine; Baltimore, Maryland, United States

17 Washington University School of Medicine, St. Louis, Missouri, United States

18 Liver Diseases Research Branch, National Institute of Diabetes and Digestive and Kidney Diseases, National Institutes of Health; Bethesda, Maryland, United States

19 Section of Pediatric Gastroenterology, Hepatology, and Nutrition, Department of Pediatrics, University of Colorado School of Medicine; Children’s Hospital Colorado; Aurora, Colorado, United States

***Corresponding Author:** Benjamin L. Shneider: [Benjamin.Shneider@bcm.edu](mailto:Benjamin.Shneider@bcm.edu)

**S2 Table. Comparison of included (Group 1) and excluded (Group 3) infants with a clinical diagnosis of biliary atresia**

| **Variable** | **Group 1 (BA Included) % or Mean (SD) N=401** | **Group 3 (BA Excluded) % or Mean (SD) N=102** | **p-value** |
| --- | --- | --- | --- |
| Race |  |  | 0.500 |
| White | 244 (63%) | 55 (57.3%) |  |
| Black | 61 (15.8%) | 19 (19.8%) |  |
| Asian | 36 (9.3%) | 7 (7.3%) |  |
| Other | 46 (11.9%) | 15 (15.6%) |  |
| Sex |  |  | 0.362 |
| Male | 191 (47.6%) | 43 (42.6%) |  |
| Female | 210 (52.4%) | 58 (57.4%) |  |
| Ethnicity |  |  | **0.009** |
| Hispanic | 92 (23%) | 36 (35.6%) |  |
| Non-Hispanic | 308 (77%) | 65 (64.4%) |  |
| Age at First Evaluation (Days) | N=401 | N=102 | **0.001** |
|  | 63.5 (30.9) | 79.7 (46.3) |  |
| Age at Disease Onset (Days) | N=401 | N=102 | **0.019** |
|  | 12.8 (18.5) | 19.9 (28.8) |  |
| Weight (kg) | N=398 | N=97 | **0.047** |
|  | 4.5 (0.9) | 4.8 (1.2) |  |
| Length (cm) | N=381 | N=91 | **0.039** |
|  | 55.5 (4) | 56.8 (5.5) |  |
| Head Circumference (cm) | N=336 | N=81 | 0.567 |
|  | 37.6 (2.2) | 37.8 (2.9) |  |
| Weight Z-Score | N=398 | N=96 | 0.152 |
|  | -1 (1) | -1.1 (1.1) |  |
| Length Z-Score | N=381 | N=90 | 0.610 |
|  | -0.8 (1.5) | -0.9 (1.6) |  |
| Head Circumference Z-Score | N=336 | N=81 | **0.066** |
|  | -1.1 (1.6) | -1.5 (1.7) |  |
| Acholic Stools |  |  | **0.043** |
| Absent | 69 (17.6%) | 25 (26.9%) |  |
| Present | 322 (82.4%) | 68 (73.1%) |  |
| Acholic Stools (3 Levels) |  |  | 0.127 |
| Normal | 69 (17.6%) | 25 (26.9%) |  |
| White or Gray | 184 (47.1%) | 38 (40.9%) |  |
| Pale | 138 (35.3%) | 30 (32.3%) |  |
| Facial Features |  |  | >0.999 |
| Normal | 380 (95.2%) | 94 (95.9%) |  |
| Abnormal | 19 (4.8%) | 4 (4.1%) |  |
| Liver Edge Palpable |  |  | **0.061** |
| Not Palpable | 26 (7.3%) | 10 (12%) |  |
| Palpable | 332 (92.7%) | 73 (88%) |  |
| Liver Edge Below Costal Margin (cm) | N=334 | N=73 | 0.112 |
|  | 3.3 (1.6) | 3.6 (1.7) |  |
| Spleen Palpable |  |  | **0.045** |
| Not Palpable | 188 (50%) | 34 (38.2%) |  |
| Palpable | 188 (50%) | 55 (61.8%) |  |
| Direct Baseline Bilirubin (mg/dL) | N=239 | N=36 | **0.015** |
|  | 5.7 (2.2) | 4.7 (3.1) |  |
| Conjugated Baseline Bilirubin (mg/dL) | N=215 | N=35 | **0.037** |
|  | 4.3 (1.6) | 3.8 (2) |  |
| Total Baseline Bilirubin (mg/dL) | N=401 | N=89 | 0.948 |
|  | 8.3 (3.1) | 8.8 (4.4) |  |
| AST (IU/L) | N=397 | N=91 | 0.261 |
|  | 232.1 (206.4) | 232.8 (209.5) |  |
| ALT (IU/L) | N=400 | N=92 | 0.157 |
|  | 154.7 (124.3) | 147.1 (129.7) |  |
| Albumin (g/dL) | N=391 | N=89 | 0.312 |
|  | 3.6 (0.5) | 3.8 (3.5) |  |
| GGTP (IU/L) | N=379 | N=78 | 0.218 |
|  | 711.9 (537.5) | 681.3 (600.9) |  |
| Platelets (103/ mm3) | N=380 | N=88 | **0.008** |
|  | 445.2 (180.2) | 383.7 (153.4) |  |
| Alkaline Phosphatase (IU/L) | N=395 | N=87 | 0.789 |
|  | 568.6 (320.7) | 606 (421.5) |  |
| Total Cholesterol (mg/dL) | N=33 | N=13 | 0.657 |
|  | 184.2 (61.3) | 198.7 (76.2) |  |
| Gallbladder |  |  | 0.149 |
| Absent | 125 (39.9%) | 36 (55.4%) |  |
| Present | 5 (1.6%) | 0 (0.0%) |  |
| Present (Small) | 142 (45.4%) | 22 (33.8%) |  |
| Normal | 41 (13.1%) | 7 (10.8%) |  |
| Gallbladder (Absent vs. Present) |  |  | **0.022** |
| Absent | 125 (39.9%) | 36 (55.4%) |  |
| Present | 188 (60.1%) | 29 (44.6%) |  |
